# Supplementary material
Source: PubMed Central journal article supplement (PMC9758528)
Supplement: mmc1.pdf [file mmc1.pdf]

## **Supplemental information**

### **Potent SARS-CoV-2 neutralizing antibodies with therapeutic effects in two animal models**

**Masaru Takeshita, Hidehiro Fukuyama, Katsuhiko Kamada, Takehisa Matsumoto, Chieko Makino-Okamura, Tomomi Uchikubo-Kamo, Yuri Tomabechi, Kazuharu Hanada, Saya Moriyama, Yoshimasa Takahashi, Hirohito Ishigaki, Misako Nakayama, Cong Thanh Nguyen, Yoshinori Kitagawa, Yasushi Itoh, Masaki Imai, Tadashi Maemura, Yuri Furusawa, Hiroshi Ueki, Kiyoko Iwatsuki-Horimoto, Mutsumi Ito, Seiya Yamayoshi, Yoshihiro Kawaoka, Mikako Shirouzu, Makoto Ishii, Hideyuki Saya, Yasushi Kondo, Yuko Kaneko, Katsuya Suzuki, Koichi Fukunaga, and Tsutomu Takeuchi**

## Supplementary Figures

|              |              |              |              |              |              |              |              |              |              |              |              |   |
|--------------|--------------|--------------|--------------|--------------|--------------|--------------|--------------|--------------|--------------|--------------|--------------|---|
| <b>Ab287</b> | -            |              |              |              |              |              |              |              |              |              |              |   |
| <b>Ab326</b> | -            | -            |              |              |              |              |              |              |              |              |              |   |
| <b>Ab354</b> | -            | -            | -            |              |              |              |              |              |              |              |              |   |
| <b>Ab376</b> | -            | -            | -            | -            |              |              |              |              |              |              |              |   |
| <b>Ab496</b> | -            | -            | -            | -            | -            |              |              |              |              |              |              |   |
| <b>Ab336</b> | -            | -            | -            | -            | -            | -            |              |              |              |              |              |   |
| <b>Ab445</b> | -            | -            | -            | -            | -            | -            | -            |              |              |              |              |   |
| <b>Ab159</b> | -            | -            | -            | -            | -            | -            | -            | -            |              |              |              |   |
| <b>Ab175</b> | -            | -            | -            | -            | -            | -            | -            | -            | -            |              |              |   |
| <b>Ab188</b> | -            | -            | -            | -            | -            | -            | -            | -            | -            | -            |              |   |
| <b>Ab308</b> | -            | -            | -            | -            | -            | -            | -            | -            | -            | -            | -            | - |
|              | <b>Ab287</b> | <b>Ab326</b> | <b>Ab354</b> | <b>Ab376</b> | <b>Ab496</b> | <b>Ab336</b> | <b>Ab445</b> | <b>Ab159</b> | <b>Ab175</b> | <b>Ab188</b> | <b>Ab308</b> |   |

Figure S1. Epitope binning assay, Related to Figure 3

The results of epitope binning are shown. The minus indicates overlapping epitopes.

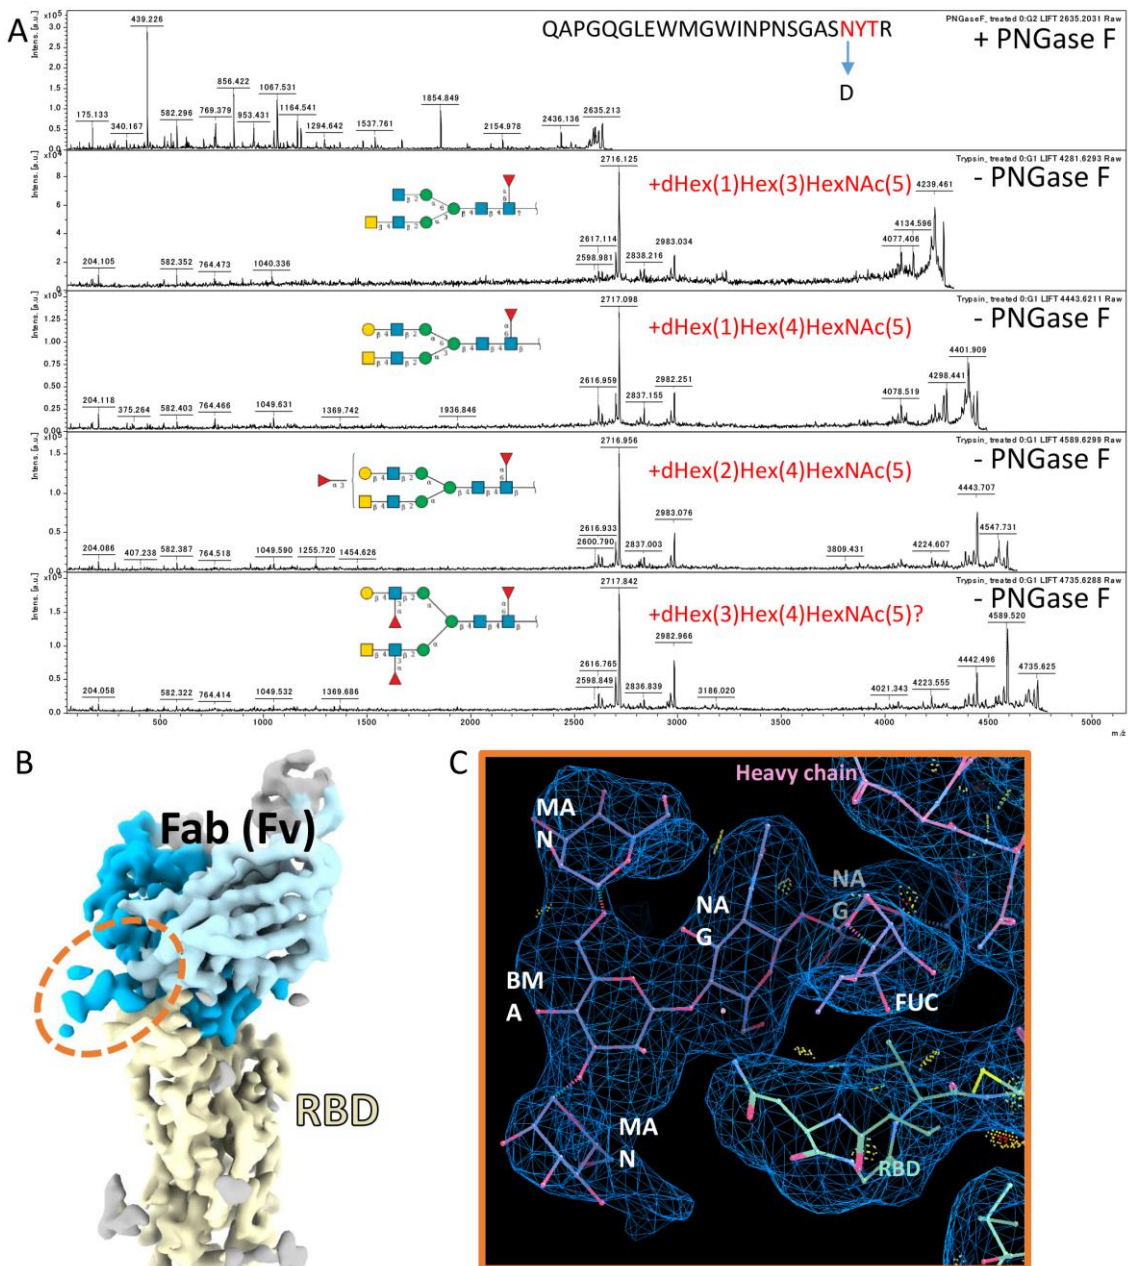

Figure S2. Identification of N-glycan composition, Related to Figure 5

(A) MS/MS spectrograms (300–5000 MW range) of the four candidates that contain a peptide of APGQGLEWMGWINPNSGASNYTR.

(B) Map after local refinement of RBD and the Fab region with specific mask. Dot circle shows the sugar density region of the heavy chain.

(C) The detail density of the sugar moiety with a traceable moiety.

## Supplementary Tables

Table S1. The characteristics of patients screened for serum neutralizing ability, Related to Figure 1

|                                                                 | Patients (n = 47)                                                                                    |
|-----------------------------------------------------------------|------------------------------------------------------------------------------------------------------|
| Sex (male)                                                      | 25 (52.1)                                                                                            |
| Age (year)                                                      | 31.5 (27–55)                                                                                         |
| Smoking: never / ex / current                                   | 35 / 0 / 13                                                                                          |
| Days between first positive PCR test and first serum collection | 48.5 (36.5–58.5)                                                                                     |
| WHO classification <sup>a</sup>                                 | Critical 2 (4.2)<br>Severe 1 (2.1)<br>Moderate 12 (25.0)<br>Mild 17 (35.4)<br>Asymptomatic 16 (33.3) |
| <Signs and symptoms>                                            |                                                                                                      |
| Fever ( $\geq 37.5^{\circ}$ )                                   | 26 (54.2)                                                                                            |
| Upper respiratory symptoms <sup>b</sup>                         | 24 (50.0)                                                                                            |
| Lower respiratory symptoms <sup>c</sup>                         | 18 (37.5)                                                                                            |
| Pneumonia                                                       | 15 (31.3)                                                                                            |
| <Laboratory data>                                               |                                                                                                      |
| Lowest lymphocyte count (/ $\mu$ l)                             | 1370 (967–1915)                                                                                      |
| Highest LD level (U/l)                                          | 190 (158–235)                                                                                        |
| Highest CRP level (mg/dl)                                       | 0.25 (0.03–1.3)                                                                                      |
| <Treatment>                                                     |                                                                                                      |
| Systemic corticosteroids                                        | 4 (8.3)                                                                                              |

Data are shown as numbers, numbers (%), or medians (interquartile ranges), as appropriate. <sup>a</sup>Disease severity is based on “Living guidance for clinical management of COVID-19,” edited by the WHO (23 Nov 2021). <sup>b</sup>Upper respiratory symptoms include rhinorrhea, sore throat, loss of smell, and loss of taste. <sup>c</sup>Lower respiratory symptoms include cough and sputum production.

WHO, World Health Organization; PCR, polymerase chain reaction; LD, lactate dehydrogenase; CRP, C-reactive protein

Table S2. The characteristics of patients for antibody production, Related to Figure 2

| Sample ID | Sex    | Age | Days after first positive PCR | Severity | Fever | Pneumonia | Systemic steroid use |
|-----------|--------|-----|-------------------------------|----------|-------|-----------|----------------------|
| COV003    | male   | 60  | 29                            | severe   | +     | +         | +                    |
| COV003-2  | male   | 60  | 103                           |          |       |           |                      |
| COV011    | male   | 65  | 39                            | critical | +     | +         | +                    |
| COV011-2  | male   | 65  | 60                            |          |       |           |                      |
| COV017    | female | 20  | 10                            | moderate | +     | +         | -                    |
| COV019    | female | 30  | 55                            | mild     | +     | -         | -                    |
| COV025    | female | 36  | 44                            | moderate | +     | +         | -                    |
| COV027    | female | 35  | 49                            | mild     | +     | -         | -                    |
| COV047    | male   | 44  | 46                            | mild     | +     | -         | -                    |
| COV052    | male   | 29  | 28                            | moderate | +     | +         | -                    |
| COV080    | male   | 33  | 62                            | moderate | +     | +         | -                    |
| COV081    | male   | 59  | 69                            | moderate | +     | +         | -                    |
| COV082    | female | 65  | 53                            | moderate | +     | +         | -                    |
| COV088    | male   | 52  | 56                            | critical | +     | +         | +                    |

PCR, polymerase chain reaction

Table S3. Cryo-EM data collection, refinement, and validation statistics for Spike RBD/Fab complexes, Related Figure to 5

| complexed with                                      | Ab159  | Ab188 | Ab326        | Ab354 | Ab445 | Ab496<br>(Fv-clasp) |
|-----------------------------------------------------|--------|-------|--------------|-------|-------|---------------------|
| EMD ID                                              | 33060  | 33061 | 33062        | 33059 | 33064 | 33063               |
| PDB ID                                              | 7X8Y   | 7X8Z  | 7X90         | 7X8W  | 7X92  | 7X91                |
| <b>Data collection and processing</b>               |        |       |              |       |       |                     |
| Voltage (kV)                                        | 300    | 300   | 300          | 300   | 300   | 300                 |
| Electron exposure (e <sup>-</sup> /Å <sup>2</sup> ) | 50     | 50    | 50           | 50    | 50    | 50                  |
| Defocus range (μm)                                  |        |       | -0.8 to -2.4 |       |       |                     |
| Pixel size (Å)                                      | 0.829  | 0.829 | 0.829        | 0.829 | 0.829 | 0.829               |
| Symmetry imposed                                    | C1     | C1    | C1           | C1    | C1    | C1                  |
| Particles in final reconstruction (no.)             | 155607 | 69153 | 42808        | 74848 | 64299 | 79377               |
| Map resolution (Å) postprocess                      | 4.1    | 4.1   | 4.2          | 3.1   | 4.1   | 4.3                 |
| FSC threshold                                       | 0.143  | 0.143 | 0.143        | 0.143 | 0.143 | 0.143               |
| Map sharpening B factor (Å <sup>2</sup> )           | -198   | -178  | -171         | -118  | -180  | -199                |
| <b>Refinement</b>                                   |        |       |              |       |       |                     |
| Initial model used                                  | 7X8W   | 7X8W  | 7X8W         | 5CCK  | 7X8W  | 7X8W                |
| RBD mode used                                       | up     | up    | down         | down  | up    | up                  |
| Model resolution (Masked) (Å)                       | 4.3    | 4.3   | 4.3          | 3.3   | 4.3   | 4.4                 |
| FSC threshold                                       | 0.5    | 0.5   | 0.5          | 0.5   | 0.5   | 0.5                 |
| <b>Model composition</b>                            |        |       |              |       |       |                     |
| Non-hydrogen atoms                                  | 3435   | 3333  | 3301         | 3460  | 3358  | 3363                |
| Protein residues                                    | 440    | 426   | 420          | 435   | 426   | 427                 |
| Ligands                                             | 1      | 1     | 2            | 8     | 2     | 2                   |
| B factors (Å <sup>2</sup> )                         |        |       |              |       |       |                     |
| Protein                                             | 111.02 | 85.93 | 91           | 103   | 97    | 132                 |
| Ligand                                              | 88.78  | 96.08 | 108          | 128   | 114   | 130                 |
| R.m.s. deviations                                   |        |       |              |       |       |                     |
| Bond lengths (Å)                                    | 0.002  | 0.003 | 0.003        | 0.003 | 0.005 | 0.003               |
| Bond angles (°)                                     | 0.522  | 0.578 | 0.568        | 0.496 | 0.734 | 0.615               |
| <b>Validation</b>                                   |        |       |              |       |       |                     |
| MolProbity score                                    | 1.89   | 2.16  | 2.11         | 1.61  | 2.26  | 2.13                |
| Clashscore                                          | 6.67   | 10.46 | 9.9          | 4.44  | 12.5  | 11.08               |
| Poor rotamers (%)                                   | 0      | 0     | 0            | 0     | 0.27  | 0                   |
| Ramachandran plot                                   |        |       |              |       |       |                     |
| Favored (%)                                         | 91.01  | 87.14 | 88.16        | 94.17 | 85.48 | 89.31               |
| Allowed (%)                                         | 8.99   | 12.62 | 11.84        | 5.83  | 14.52 | 10.69               |
| Disallowed (%)                                      | 0      | 0.24  | 0            | 0     | 0     | 0                   |

Table S4. Primer sequences, Related to Figure 2

|             |             | 5' - 3' sequence                                                                                                                      |                                        |
|-------------|-------------|---------------------------------------------------------------------------------------------------------------------------------------|----------------------------------------|
| primer      | Forward     | CAGTGGTATCAACGCAGAGTACG                                                                                                               |                                        |
| set1        | Reverse IgG | TGAGTTCCACGACACCGTCAC                                                                                                                 |                                        |
|             | Reverse IgA | TTCGCTCCAGGTCACTGAG                                                                                                                   |                                        |
|             | Reverse IgM | ACAAAGTGATGGAGTCGGGAAG                                                                                                                |                                        |
|             | Reverse Igk | TCCGAGCTCGGTACCAAGCTAACACTCTCCCCTGTTGAAGCTC                                                                                           |                                        |
|             | Reverse Igλ | TCCGAGCTCGGTACCAAGCTATGAACATTCTGTAGGGGCCACT<br>TCCGAGCTCGGTACCAAGCTATGAACATTCCGTAGGGGCAAC<br>TCCGAGCTCGGTACCAAGCTATGAACATTCTGCAGGGGCC |                                        |
| primer      | Forward IgH | TGAGCTACGGACTCGAGCAGGTGCAGCTGGTGCAG                                                                                                   |                                        |
| set2        |             | TGAGCTACGGACTCGAGGAGGTGCAGCTGGTGCAG                                                                                                   |                                        |
|             |             | TGAGCTACGGACTCGAGGAGGTGCAGCTGGTGGAG                                                                                                   |                                        |
|             |             | TGAGCTACGGACTCGAGGAGGTGCAGCTGTTGGAG                                                                                                   |                                        |
|             |             | TGAGCTACGGACTCGAGCAGGTGCAGCTGCAGGAG                                                                                                   |                                        |
|             |             | TGAGCTACGGACTCGAGCAGGTGCAGCTACAGCAGTG                                                                                                 |                                        |
|             |             | TGAGCTACGGACTCGAGCAGGTTGAGCTGGTGCAG                                                                                                   |                                        |
|             |             | TGAGCTACGGACTCGAGCAGGTCCAGCTGGTACAG                                                                                                   |                                        |
|             |             | TGAGCTACGGACTCGAGCAGGTGCAGCTGGTGGAG                                                                                                   |                                        |
|             |             | TGAGCTACGGACTCGAGGAAGTGCAGCTGGTGGAG                                                                                                   |                                        |
|             |             | TGAGCTACGGACTCGAGCAGCTGCAGCTGCAGGAG                                                                                                   |                                        |
|             |             | TGAGCTACGGACTCGAGCAGGTACAGCTGCAGCAG                                                                                                   |                                        |
|             | Forward Igk |                                                                                                                                       | TGAGCTACGGACTCGAGGACATCCAGATGACCCAGTC  |
|             |             |                                                                                                                                       | TGAGCTACGGACTCGAGGACATCCAGTTGACCCAGTCT |
|             |             | TGAGCTACGGACTCGAGGCCATCCGGATGACCCA                                                                                                    |                                        |
|             |             | TGAGCTACGGACTCGAGGATATTGTGATGACCCAGACTCC                                                                                              |                                        |
|             |             | TGAGCTACGGACTCGAGGATATTGTGATGACTCAGTCTCC                                                                                              |                                        |
|             |             | TGAGCTACGGACTCGAGGATGTTGTGATGACTCAGTCTCC                                                                                              |                                        |
|             |             | TGAGCTACGGACTCGAGGAAATTGTGTTGACACAGTCTCC                                                                                              |                                        |
|             |             | TGAGCTACGGACTCGAGGAAATAGTGATGACGCAGTCTCC                                                                                              |                                        |
|             |             | TGAGCTACGGACTCGAGGAAATTGTGTTGACGCAGTCT                                                                                                |                                        |
|             |             | TGAGCTACGGACTCGAGGACATCGTGATGACCCAGTC                                                                                                 |                                        |
| Reverse Igλ |             | TGAGCTACGGACTCGAGCAGTCTGTGCTGACKCAGC                                                                                                  |                                        |
|             |             | TGAGCTACGGACTCGAGCAGTCTGCCCTGACTCAGC                                                                                                  |                                        |
|             |             | TGAGCTACGGACTCGAGTCCTATGAGCTGACWCAGCC                                                                                                 |                                        |
|             |             | TGAGCTACGGACTCGAGCAGCYTGTGCTGACTCAGTC                                                                                                 |                                        |

TGAGCTACGGACTCGAGAATTTTATGCTGACTCAGCCG  
TGAGCTACGGACTCGAGCAGRCTGTGGTGACYCAG

---

Reverse IgG GATGGGCCCTTGGTGA

---

Reverse IgA TCACACTGAGTGGCTCCTGG

---

Reverse IgM TCGTATCCGACGGGGAATTC

---

Reverse Igk GGAAGATGAAGACAGATGGTG

---

Reverse Igλ AGCTCCTCAGAGGAGGGC  
TCCTCAGAGGAGGGTGG

---

primer Forward IgH ACAGGTGCCCACTCCCAGGTGCAG  
set3 AAGGTGTCCAGTGTGARGTGCAG  
CCCAGATGGGTCTGTCCCAGGTGCAG  
CAAGGAGTCTGTTCCGAGGTGCAG

---

Forward Igk ATGAGGSTCCCYGCTCAGCTGCTGG  
CTCTTCCTCCTGCTACTCTGGCTCCCAG  
ATTTCTCTGTTGCTCTGGATCTCTG

---

Reverse Igλ GGCCTGGGCCAGTCTGTGCTG  
GGTCCTGGGCCAGTCTGCCCTG  
GCTCTGTGACCTCCTATGAGCTG  
GGTCTCTCTCSCAGCYTGTGCTG  
GTTCTTGGGCCAATTTTATGCTG  
GGTCCAATTCYCAGGCTGTGGTG  
GAGTGGATTCTCAGACTGTGGTG

---

Reverse IgG GATGGGCCCTTGGTGA

---

Reverse IgA TCACACTGAGTGGCTCCTGG

---

Reverse IgM TCGTATCCGACGGGGAATTC

---

Reverse Igk GGAAGATGAAGACAGATGGTG

---

Reverse Igλ AGCTCCTCAGAGGAGGGC  
TCCTCAGAGGAGGGTGG

---

primer Forward Optimized for each cell

---

set4 Reverse IgG GATGGGCCCTTGGTGA

---

Reverse IgA Optimized for each cell

---

Reverse IgM Optimized for each cell

---

Reverse Igk GGAAGATGAAGACAGATGGTG

---

Reverse Igλ AGCTCCTCAGAGGAGGGC  
TCCTCAGAGGAGGGTGG

---



Table S5. The sequences of selected antibodies, Related to Figure 4 and Figure 5

---

Ab159 Heavy chain

CAGGTGCAGCTGGTGGAGTCTGGGGGAGGCTTGGTAAAGCCTGGGGGGTCCCTTAGACTCTCCTG  
TGCAGCCTCTGGATTCACCTTCAATAACGCCTGGATGAGCTGGGTCCGCCAGGCTCCAGGGAAGG  
GGCTGGAGTGGGTTGGCCGTATTAAGCAAACTGATGGTGGGACAACAGACTACGCTGCACCC  
GTGAAAGGCAGATTCACCTTCTCAAGAGATGATTCAAAAAACACGCTGTATCTGCAAATGAGCAGCC  
TGAAAACCGAGGACACAGCCCTGTATTACTGTACCACAGCGGATTACGATATCTTGACTGGTACCC  
CCGCCTCCCCATACTGGGGCCAGGGAACCCTGGTCACCGTCTCCTCAG

---

Ab159 Light chain (Kappa)

GACATCCAGATGACCCAGTCTCCATCCTCCCTGTCTGCATCTGTAGGAGACAGAGTCACCATCACTT  
GCCGGGCAAGTCAGAGCATTACCAACTATTTAAATTGGTATCAGCAGAAACCAGGGAAAGCCCCTA  
AATCCTGATCTATGCTGCATCCAGTTTGCAAGGTGGGGTCCCATCAAGGTTCCGTGGCAGTGGAT  
CTGGGACAGATTTCACTCTCACCATCAGCAGTCTGCAACCTGAAGATTTTGAACCTTACTACTGTCA  
ACAGACTTACAGTACCCTCTGGACGTTCCGGCCAAGGGACCAAGGTGGAAATCAAAC

---

Ab188 Heavy chain

GAAGTGCAGCTGGTGGAGTCTGGGGGAGGCTTGGTACAGCCTGGGGGGTCCCTGAGACTCTCCT  
GTGCAGCCTCTGGATTCACCTTCATTAATAAAATGAACTGGGTCCGCCAGGCTCCAGGGAAGG  
GGCTGGAGTGGGTTTCATACATTAGTAGTGGTAGTGATGCCATTTACTACGCAGACTCTGTGAAGG  
GCCGATTCACCATCTCCAGAGACAATGCCAAGAACTCACTGTATCTGCAAATGAACAGCCTGAGAG  
ACGAGGACACGGCTCTGTATTACTGTGCGAGAGGGGGTGGATACTAATACTATGGCGAGTGTATGGAC  
GTCTGGGGCCAAGGGACCACGGTCACCGTCTCCTCAG

---

Ab188 Light chain (Kappa)

GACATCCAGATGACCCAGTCTCCAGACTCCCTGGCTGTGTCTCTGGGCGAGAGGGCCACCATCAA  
CTGCAAGTCCAGCCAGAGTGTTTTATACAGCTCCAACAATAAGAACTACTTAGCTTGGTACCAGCAG  
AAACCAGGACAGCCTCCTAACTGCTCATTTACTGGGCATCTACCCGGGAATCCGGGGTCCCTGAC  
CGATTCAGTGGCAGCGGGTCTGGGACAGATTTCACTCTCACCATCAGCAGCCTGCAGGCTGAAGAT  
GTGGCAGTTTATTACTGTCAGCATTATTATAGTCCTCCTCCCACTTTCCGGCGGAGGGACCAAGGTG  
GAGATCAAAC

---

Ab326 Heavy chain

GAAGTGCAGCTGGTGGAGTCTGGGGGAGGCGTGGTCCAGCCTGGGAGGTCCCTGAGACTCTCCT  
GTGCAGCCTCTGGATTCACCTTCAGTCACTATCCTATGCACTGGGTCCGCCAGGCTCCAGGCAGGG  
GGCTGGAGTGGGTGGCAGTTATATCATATGATGGAAGTAATCAACACTACGTAGACTCCGTGAAGG  
GCCGATTCACCATCTCCAGAGACAATTCCAAGAACACGCTGTATTTGCAAATGAACAGCCTGAGAG  
CTGAGGACACGGCTGTGTATTTCTGTGCGAGCCTAATACTATGATTCGGGGAGTTCCCGACTACT  
GGGGCCAGGGAACCCTGGTCACCGTCTCCTCAG

---

Ab326 Light chain (Kappa)

GACATCCAGATGACCCAGTCTCCATCCTCCCTGTCTGCATCTGTTGGAGACAGAGTCACCATCACTT  
GCCGGGCAAGTCAGAGCATTAGCAACTATTTAAATTGGTATCAGCAGAAACCAGGGAAAGCCCCTA

---

ACCTCCTAATCTTTGCTGCATCCAGTTTGCAAAGTGGGGTCCCATCAAGGTTTCAGTGGCAGTGGAT  
CTGGGACAGAATTCCTCTCACCATCAGCAGTCTGCAACCTGAAGATTTTGCAGCTTACTACTGTCT  
GCAGACTTACAGTACCCCTCGTACTTTTGGCCAGGGGACCAGGCTGGAGATCAAAC

---

Ab354 Heavy chain

CAGGTGCAGCTGGTGCAGTCTGGGGCTGAGGTGAAGAAGCCTGGGGCCTCAGTGACGGTCTCCT  
GCAAGGCTTCTGGATTCTCTTACCCGGCTACTATATGCACTGGGTGCGACAGGCCCTGGACAAG  
GGCTTGAGTGGATGGGATGGATCAACCCTAACAGTGGTGCCTCAAACCTATACACGGAAATTTTCAGG  
GCAGGGTCCACATGACCAGGGACACGTCCATCAGCGCTACCTACATGAAACTGAGCAGGCTGACA  
TCTGACGACACGGCCGTGTATTACTGTGCGAGAGATCTCGCTTTTAGTATGGTTTCGGGGAGCTCTT  
GACTACTGGGGCCAGGGAACCCTGGTCACCGTCTCCTCAG

---

Ab354 Light chain (Lambda chain)

CAGCTTGTGCTGACTCAGCCTCCCTCCGCGTCCGGTCTCCTGGACAGTCAGTCACCATCTCCTGC  
ACTGGAACCAGCAGTGACGTTGGTGGTTATAACTATGTCTCCTGGTACCAACATCACCCAGGCAAA  
GCCCCAAACTCATGATTTATGAGGTGAGTAAGCGGCCCTCAGGGTCCCTGATCGCTTCTCTGGC  
TCCAAGTCTGGCAACACGGCCTCCCTGACCGTCTCTGGGCTCCAGGCTGAAGATGAGGCTGATTAT  
TACTGCAACTCATATGCAGGCAACAACAATTGGGTCTTCGGAACCTGGGACCAAGGTCACCGTCCTA  
G

---

Ab445 Heavy chain

GAAGTGCAGCTGGTGGAGTCTGGGGGAGGCGTGGTCCAGCCTGGGACGTCCCCGAGACTCTCCT  
GTGCAGCGTCTGGATTCACCTTCAGTAACCTCTGGCATGCACTGGGTCCGCCAGGCTCCAGGCAAG  
GGGCTGGAGTGGGTGGCAGTTATATGGTATGATGGAAGTAAAAATATTATGTAGACTCCGTGAAG  
GGCCGATTCACCATCTCCAGAGACAATCCAAGAACACGCTGTATCTGCAATGAACAGCCTGAGA  
GCCGAGGACACGGCTGTGTATTACTGTGCGAGAGATGGGACCGTAGCAGTTCGGGGAGTTATGAA  
CCCGTTTTTTGACTACTGGGGCCAGGGAACCCTGGTCACCGTCTCCTCAG

---

Ab445 Light chain (Kappa)

GACATCCAGTTGACCCAGTCTCCATCCTCCCTGTCTGCATCTGTAGGAGACAGAGTCACCATCACTT  
GCCAGGCGAGTCAGGACATTAGCAACTATTTAAATTGGTATCAGCAGATACCAGGGAAAGCCCCTA  
AGCTCCTGATCTACGATGCATCCAATTTGGAAACAGGGGTCCCATCAAGGTTTCAGTGGAAAGTGGAT  
CTGGGACAGATTTTACTTTACCATCAGCAGCCTGCAGCCTGAAGATATTGCAACATATTACTGTCA  
ACAGTATGATAATCTCCCGTACACTTTTGGCCAGGGGACCAAGCTGGAGATCAAAC

---

Ab496 Heavy chain

GAGGTGCAGCTGGTGCAGTCTGGGCCTGAGGTGAAGAAGCCTGGGACCTCAGTGAAGGTCTCCTG  
CAAGGCTTCTGGATTCATCTTTACTAACTCTGCTGTGCAGTGGGTGCGACAGGCTCGTGGACAACG  
CCTTGAGTGGATAGGATGGATCGTTCGTTGGCAGTGGTAACCCAAACTACGCACAGAAGTTCCAGGA  
AAGAGTCACCATTACCAGGGACAGGTCCACAAGCACAGCCTACATGGAGCTGAGCAGCCTGACATC  
CGAGGACACGGCCGTGTACTACTGTGCGGCCTTCCCCTATTACTATGATAATAGTGGCTCCGGGCC  
GTGGGGCCAGGGAACCCTGGTCACCGTCTCCTCAG

---

Ab496 Light chain (Kappa)

GACATCCAGTTGACCCAGTCTCCATCCTCCCTGTCTGCATCTGTAGGAGACAGAGTCACCATCACTT  
GCCAGGCGAGTCAGGACATTAGGAACAATTTAAATTGGTATCAGCAGATACCAGGGAAAGCCCCTA  
AGCTCCTGATCTACGATGCATCCAATTTGGAAACAGGGGTCCCATCAAGGTTTCAGTGGAAGTGCAT  
CTGGGACAGATTTTACTTTCACCATCAGCAGTCTGCAGCCTGAAGATGTTGCAACATATTACTGTCA  
ACAGTATGCTAATCTCCCTCCATTCACTTTCGGCCCTGGGACCAAAGTGGATATCAAAC

---
